# Supplementary material for: Drastic sensitivity enhancement in 29Si MAS NMR of zeolites and mesoporous silica materials by paramagnetic doping of Cu2+
Source: Royal Society of Chemistry journal article supplement (doi:10.1039/c3cp51829a), 2013-01-01
Supplement: c3cp51829a.pdf [file c3cp51829a.pdf]

## Supporting Information

# Drastic sensitivity enhancement in $^{29}\text{Si}$ MAS NMR in zeolites and mesoporous silica materials by paramagnetic doping of $\text{Cu}^{2+}$

Satoshi Inagaki,\* Izuru Kawamura, Yukichi Sasaki, Kaname Yoshida, Akira Naito, Yoshihiro Kubota

**Table S1 Textural properties of mesoporous silica materials and zeolite beta**

| Sample            | BET surface area / $\text{m}^2 \text{g}^{-1}$ | Micropore volume ( $t$ -plot) / $\text{cm}^3 \text{g}^{-1}$ | Mesopore volume (BJH) / $\text{cm}^3 \text{g}^{-1}$ | Mesopore diameter, $D$ (BJH) / nm | $d_{100}$ value (XRD) / nm | Thickness of mesopore wall, $t^a$ / nm |
|-------------------|-----------------------------------------------|-------------------------------------------------------------|-----------------------------------------------------|-----------------------------------|----------------------------|----------------------------------------|
| MCM-41            | 1150                                          | $< 10^{-4}$                                                 | 1.04                                                | 2.8                               | 3.48                       | 1.7                                    |
| SBA-15            | 1007                                          | 0.025                                                       | 1.16                                                | 8.3                               | 9.80                       | 3.0                                    |
| dealuminated beta | 457                                           | 0.228                                                       | –                                                   | –                                 | –                          | –                                      |
| pure silica beta  | 488                                           | 0.203                                                       | –                                                   | –                                 | –                          | –                                      |
| [Fe]-beta         | 560                                           | 0.240                                                       | –                                                   | –                                 | –                          | –                                      |

<sup>a</sup> The thickness of mesopore wall,  $t$ , was estimated using the equation (1):

$$t = \frac{2}{\sqrt{3}}d_{100} - D \quad (1)$$

## Figure Captions in Supporting Information

Figure S1. Powder XRD patterns of (a) MCM-41 and (b) SBA-15.

Figure S2. Nitrogen adsorption-desorption isotherms at 77 K of (a) MCM-41 and (b) SBA-15. The isotherm of (b) was offset vertically with  $800 \text{ cm}^3 \text{ (S.T.P.) g}^{-1}$ . Open and closed symbols mean adsorption and desorption branches, respectively.

Figure S3. Pore size distributions of (a) MCM-41 and (b) SBA-15 determined by the BJH method.

Figure S4. Typical SEM images of (a) MCM-41 and (b) SBA-15.

Figure S5. Peak-area distributions of  $Q^2$ ,  $Q^3$  and  $Q^4$  signals by various recycle times from 3 to 240 s. (a) Unmodified SBA-15; (b) 1.0-Cu(NO<sub>3</sub>)<sub>2</sub>/SBA-15; (c) 1.0-Cu-EDTA/SBA-15.

Figure S6. Powder XRD patterns of (a) dealuminated beta, (b) pure silica beta and (c) [Fe]-beta (Si/Fe = 58).

Figure S7. Nitrogen adsorption-desorption isotherms at 77 K of (a) dealuminated beta, (b) pure silica beta and (c) [Fe]-beta (Si/Fe = 58). The isotherms of (b) and (c) were offset vertically with 200 and  $400 \text{ cm}^3 \text{ (S.T.P.) g}^{-1}$ , respectively. Open and closed symbols mean adsorption and desorption branches, respectively.

Figure S8. Typical SEM images of (a) dealuminated beta, (b) pure silica beta and (c) [Fe]-beta (Si/Fe = 58).

Figures S9. (A) Relative peak heights of  $Q^4$  signals at  $-112$  ppm by various recycle times from 3 to 30 s. ( $\circ$ ) Unmodified deAl-beta; ( $\Delta$ ) 0.1-Cu(NO<sub>3</sub>)<sub>2</sub>/deAl-beta; ( $\diamond$ ) 0.3-Cu(NO<sub>3</sub>)<sub>2</sub>/deAl-beta; ( $\square$ ) 0.5-Cu(NO<sub>3</sub>)<sub>2</sub>/deAl-beta; ( $\bullet$ ) 1.0-Cu(NO<sub>3</sub>)<sub>2</sub>/deAl-beta.

(B) Relative peak heights of  $Q^4$  signals at  $-115$  ppm by various recycle times from 3 to 30 s. ( $\circ$ ) Unmodified deAl-beta; ( $\Delta$ ) 0.1-Cu(NO<sub>3</sub>)<sub>2</sub>/deAl-beta; ( $\diamond$ ) 0.3-Cu(NO<sub>3</sub>)<sub>2</sub>/deAl-beta; ( $\square$ ) 0.5-Cu(NO<sub>3</sub>)<sub>2</sub>/deAl-beta; ( $\bullet$ ) 1.0-Cu(NO<sub>3</sub>)<sub>2</sub>/deAl-beta.

Figure S10. Relative peak heights of  $Q^4$  signals at  $-112$  ppm by various recycle times from 3 to 30 s. ( $\circ$ ) unmodified deAl-beta; ( $\Delta$ ) 1.0-Co(NO<sub>3</sub>)<sub>2</sub>/deAl-beta; ( $\diamond$ ) 1.0-Ni(NO<sub>3</sub>)<sub>2</sub>/deAl-beta; ( $\bullet$ ) 1.0-Cu(NO<sub>3</sub>)<sub>2</sub>/deAl-beta.

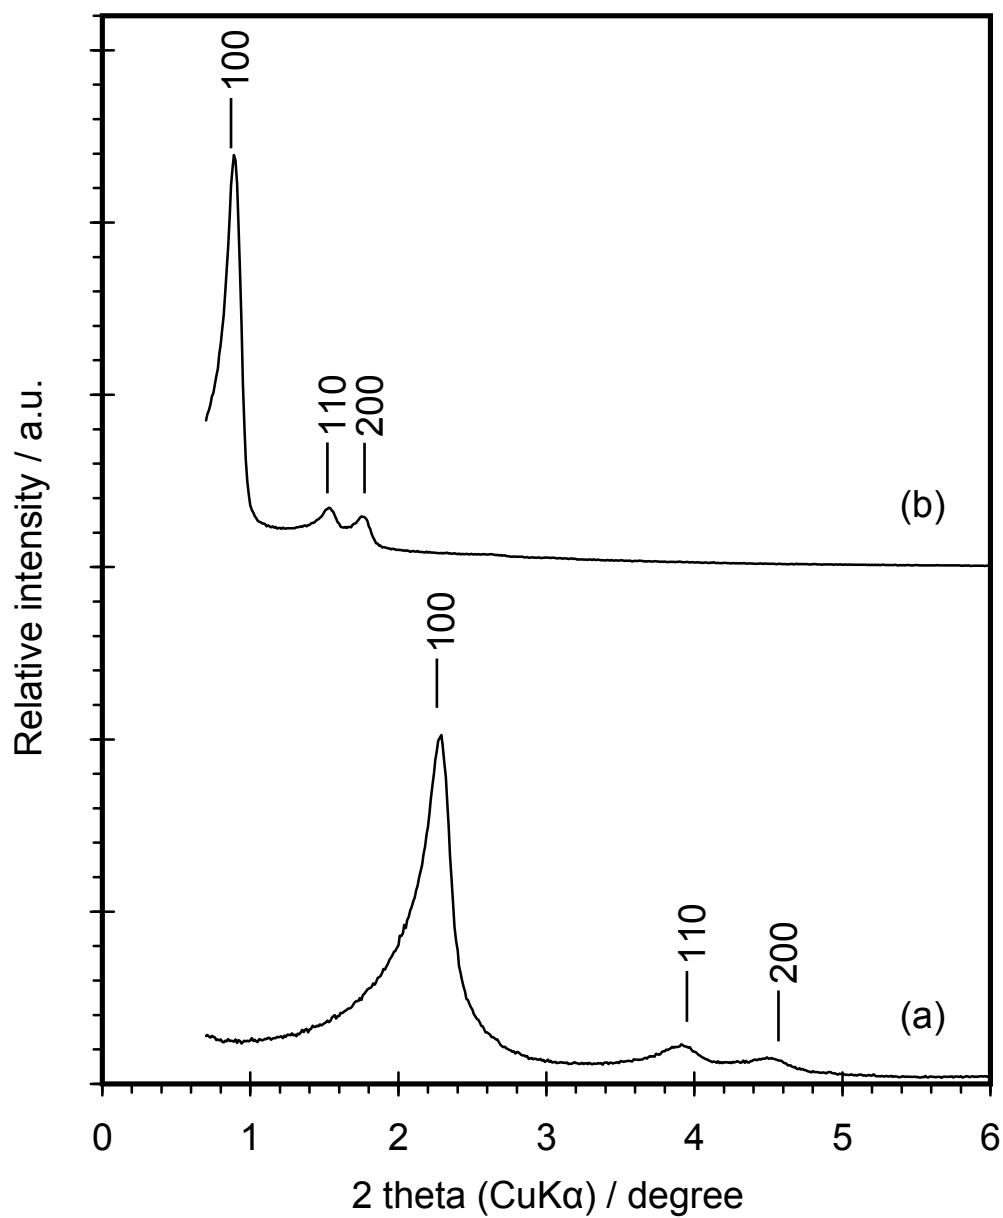

Figure S1. Powder XRD patterns of (a) MCM-41 and (b) SBA-15.

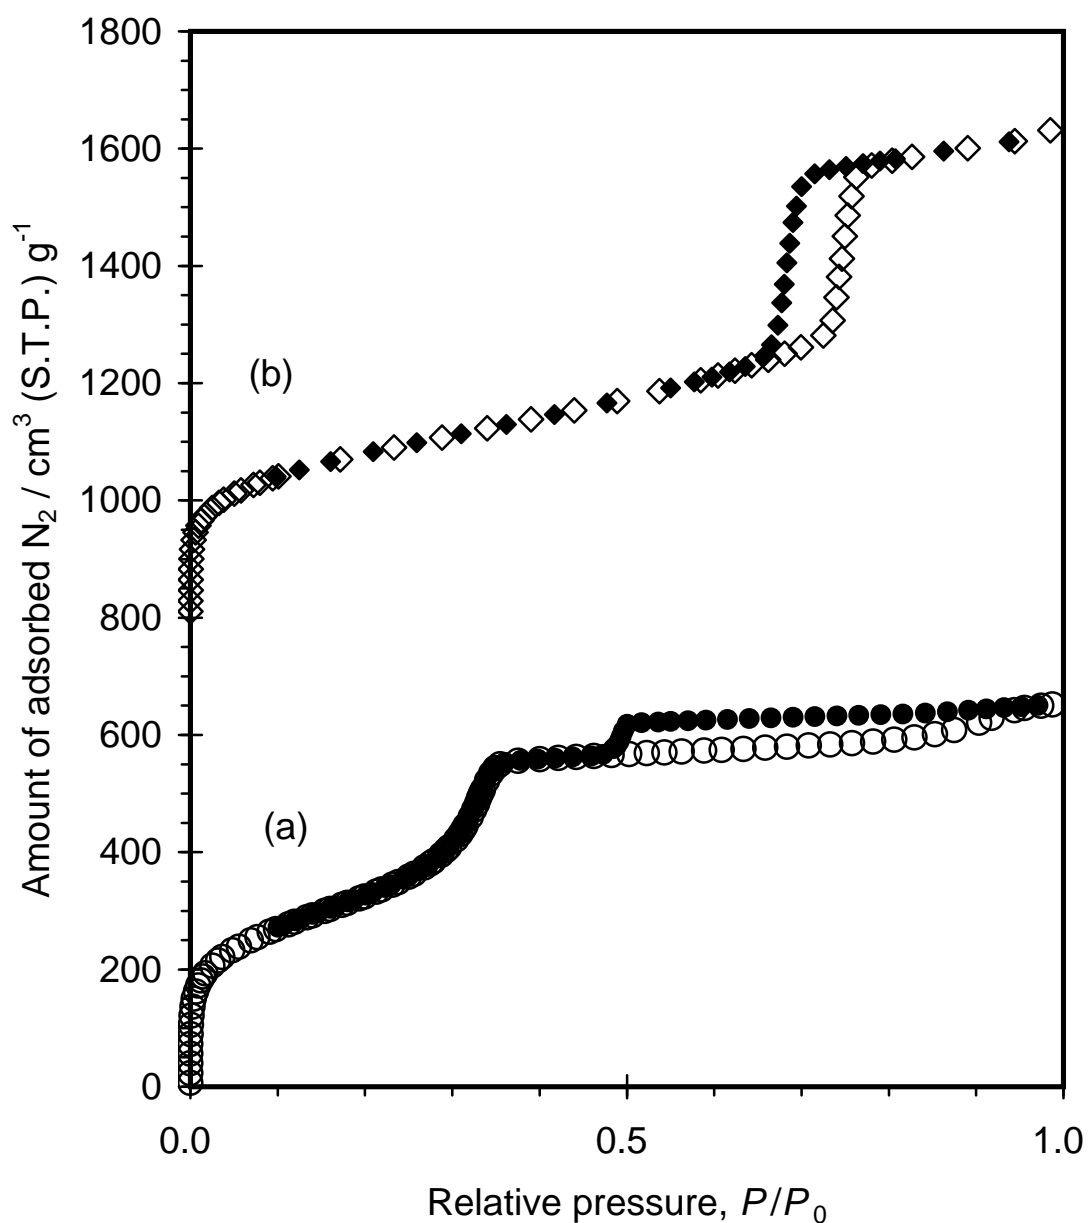

Figure S2. Nitrogen adsorption-desorption isotherms at 77 K of (a) MCM-41 and (b) SBA-15. The isotherm of (b) was offset vertically with 800 cm<sup>3</sup> (S.T.P.) g<sup>-1</sup>. Open and closed symbols mean adsorption and desorption branches, respectively.

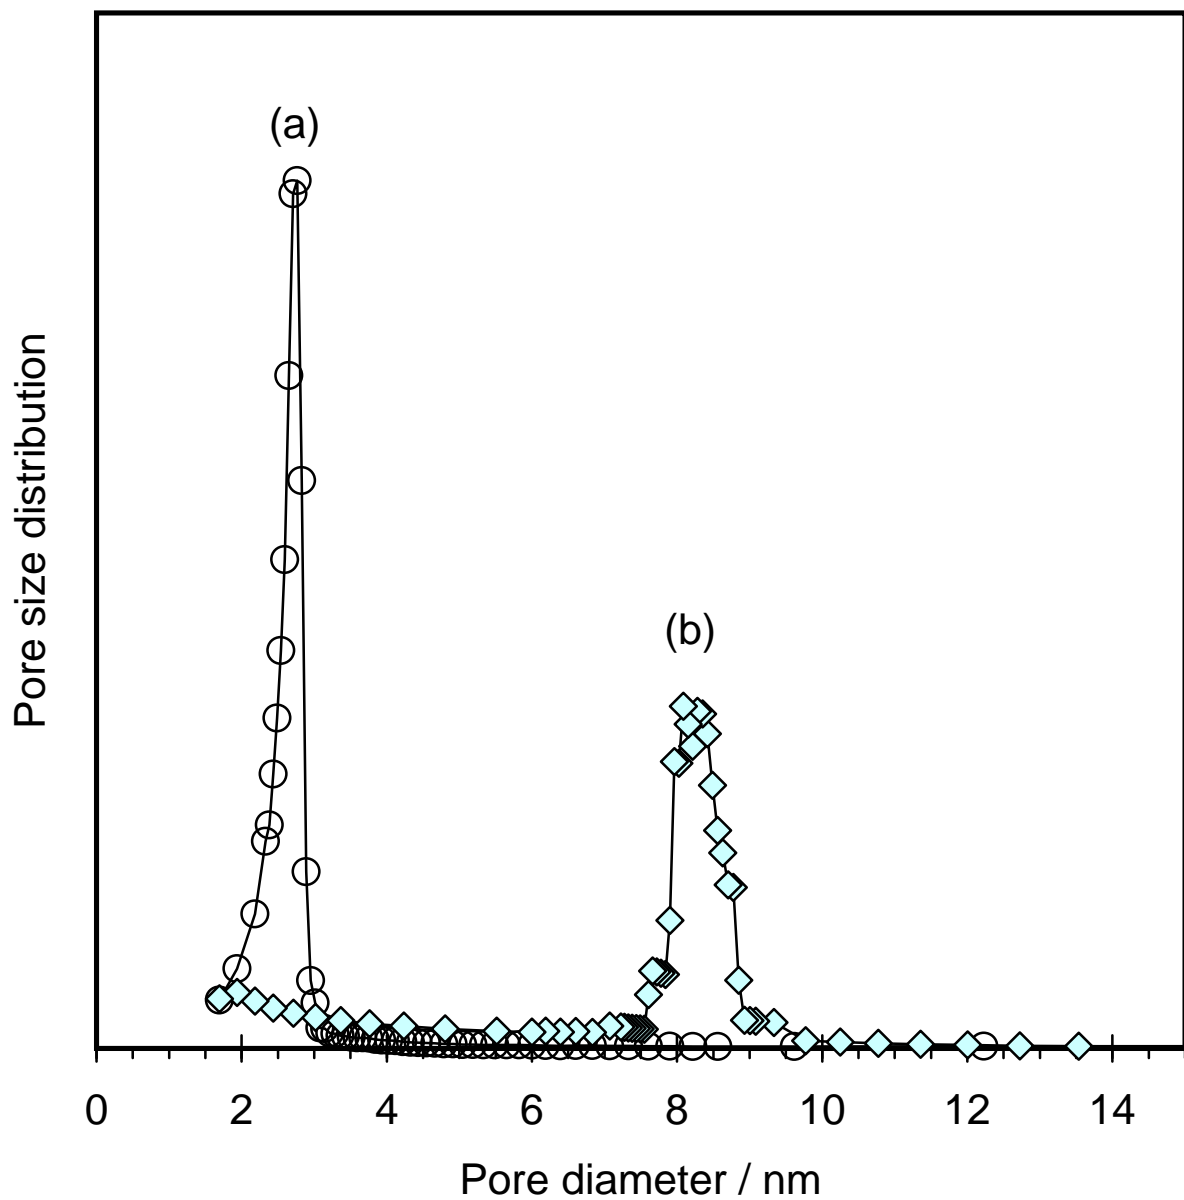

Figure S3. Pore size distributions of (a) MCM-41 and (b) SBA-15 determined by the BJH method.

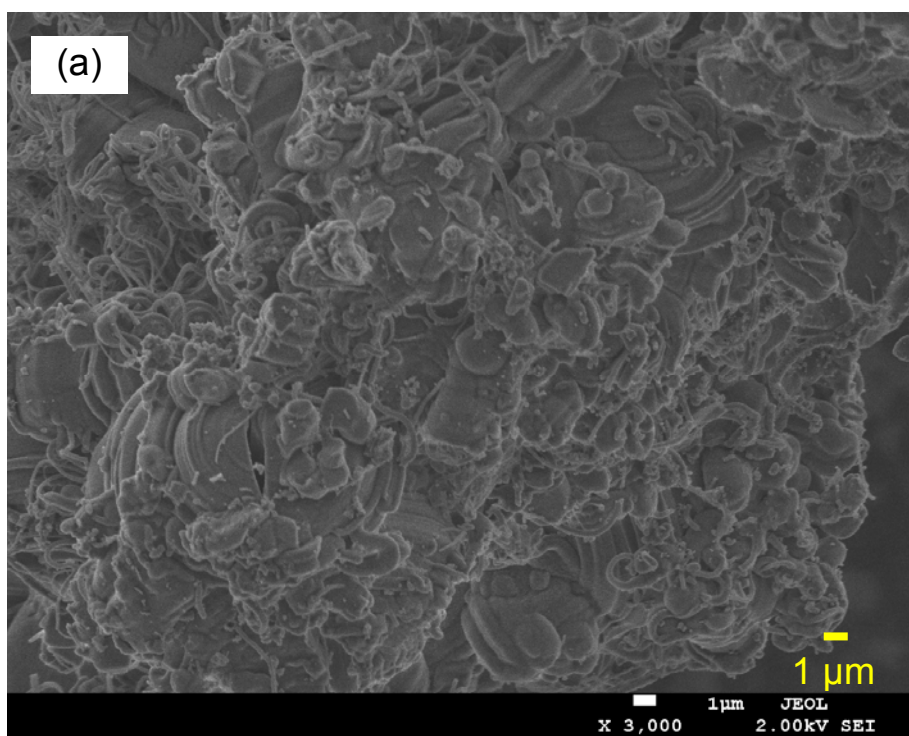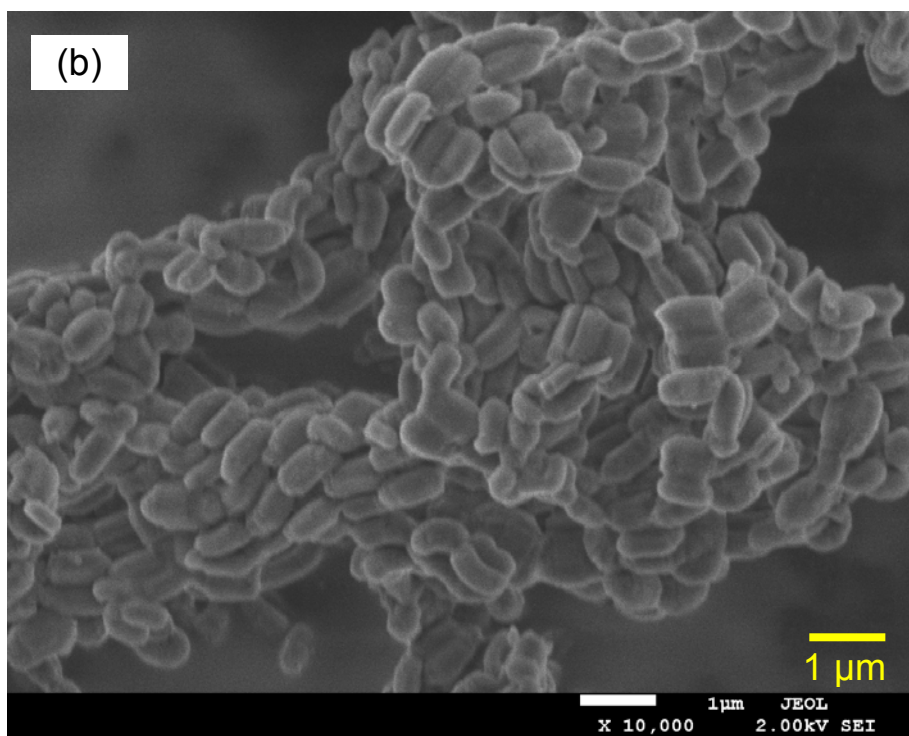

Figure S4. Typical SEM images of (a) MCM-41 and (b) SBA-15.

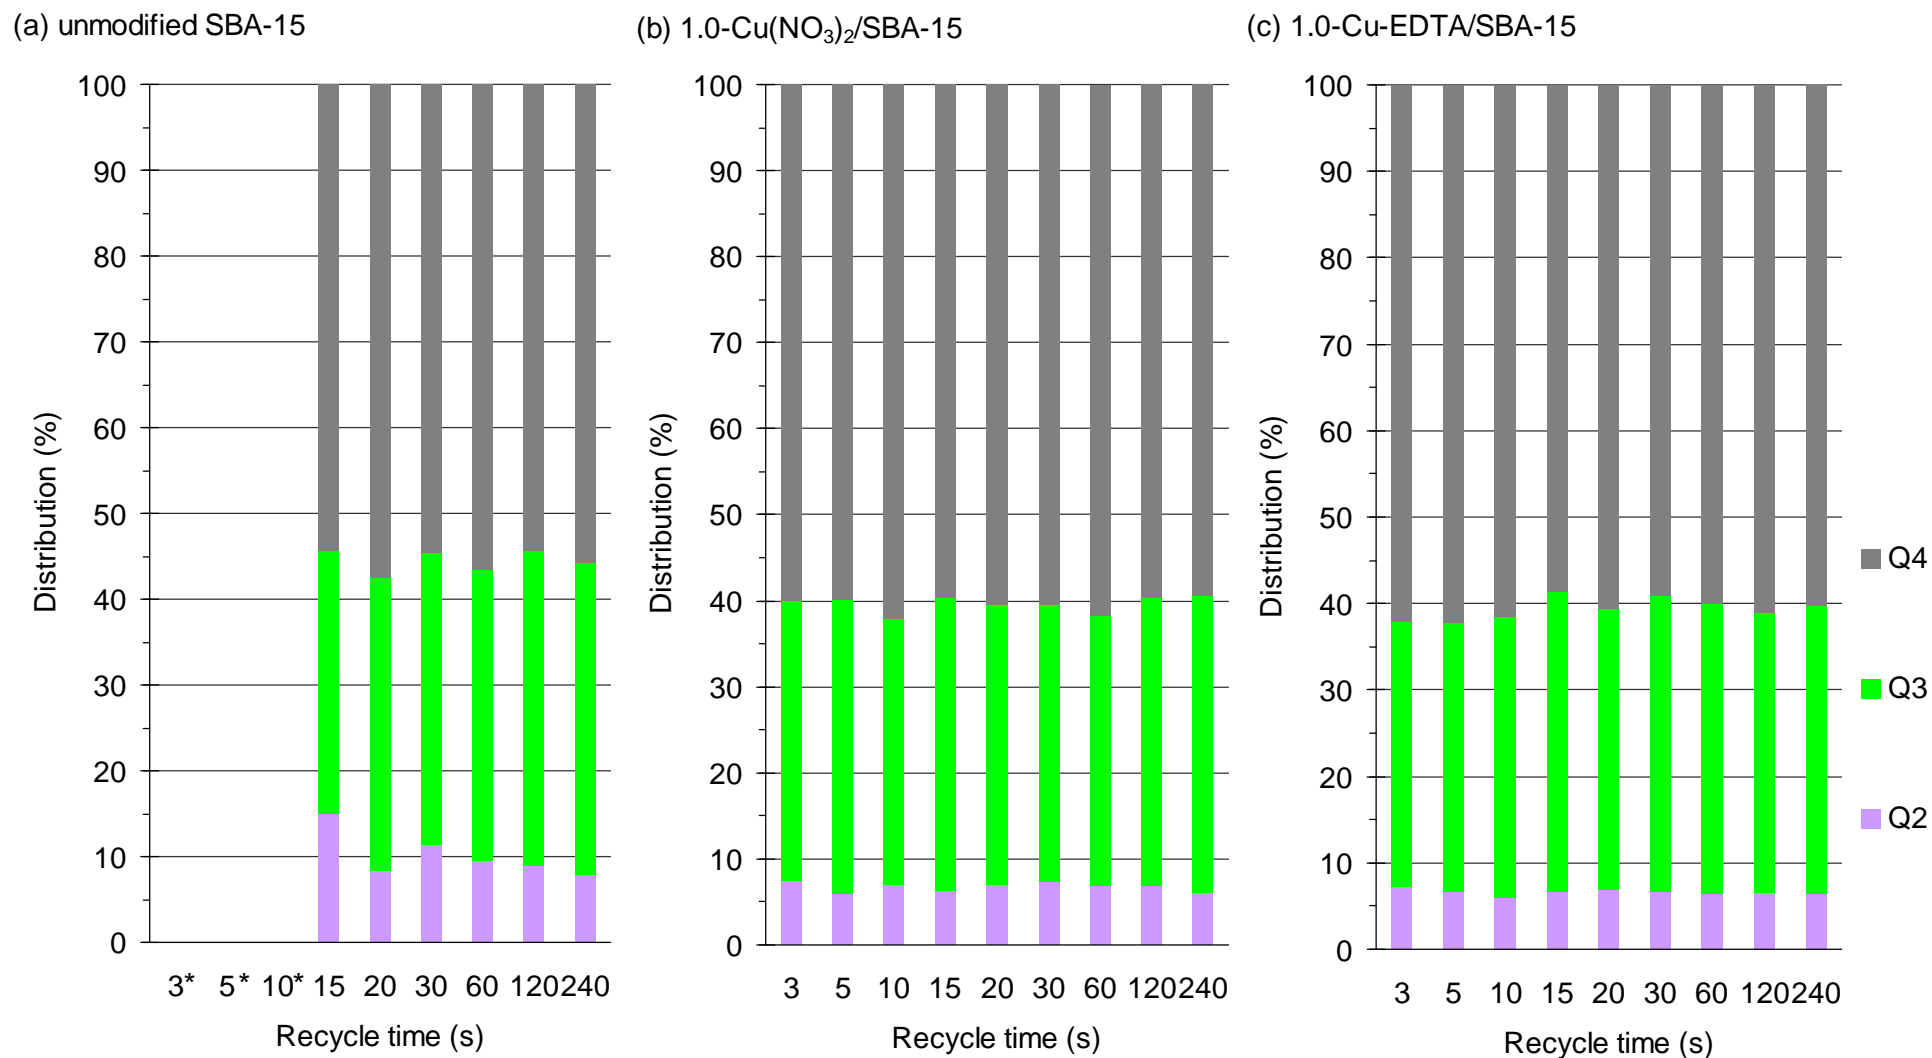

Figure S5. Peak-area distributions of Q<sup>2</sup>, Q<sup>3</sup> and Q<sup>4</sup> signals by various recycle times from 3 to 240 s.  
(a) Unmodified SBA-15; (b) 1.0-Cu(NO<sub>3</sub>)<sub>2</sub>/SBA-15; (c) 1.0-Cu-EDTA/SBA-15.

\*The broad spectra of 3, 5 and 10 s (recycle time) in unmodified SBA-15 are impossible to deconvolute as Q<sup>2</sup>, Q<sup>3</sup> and Q<sup>4</sup> signals.



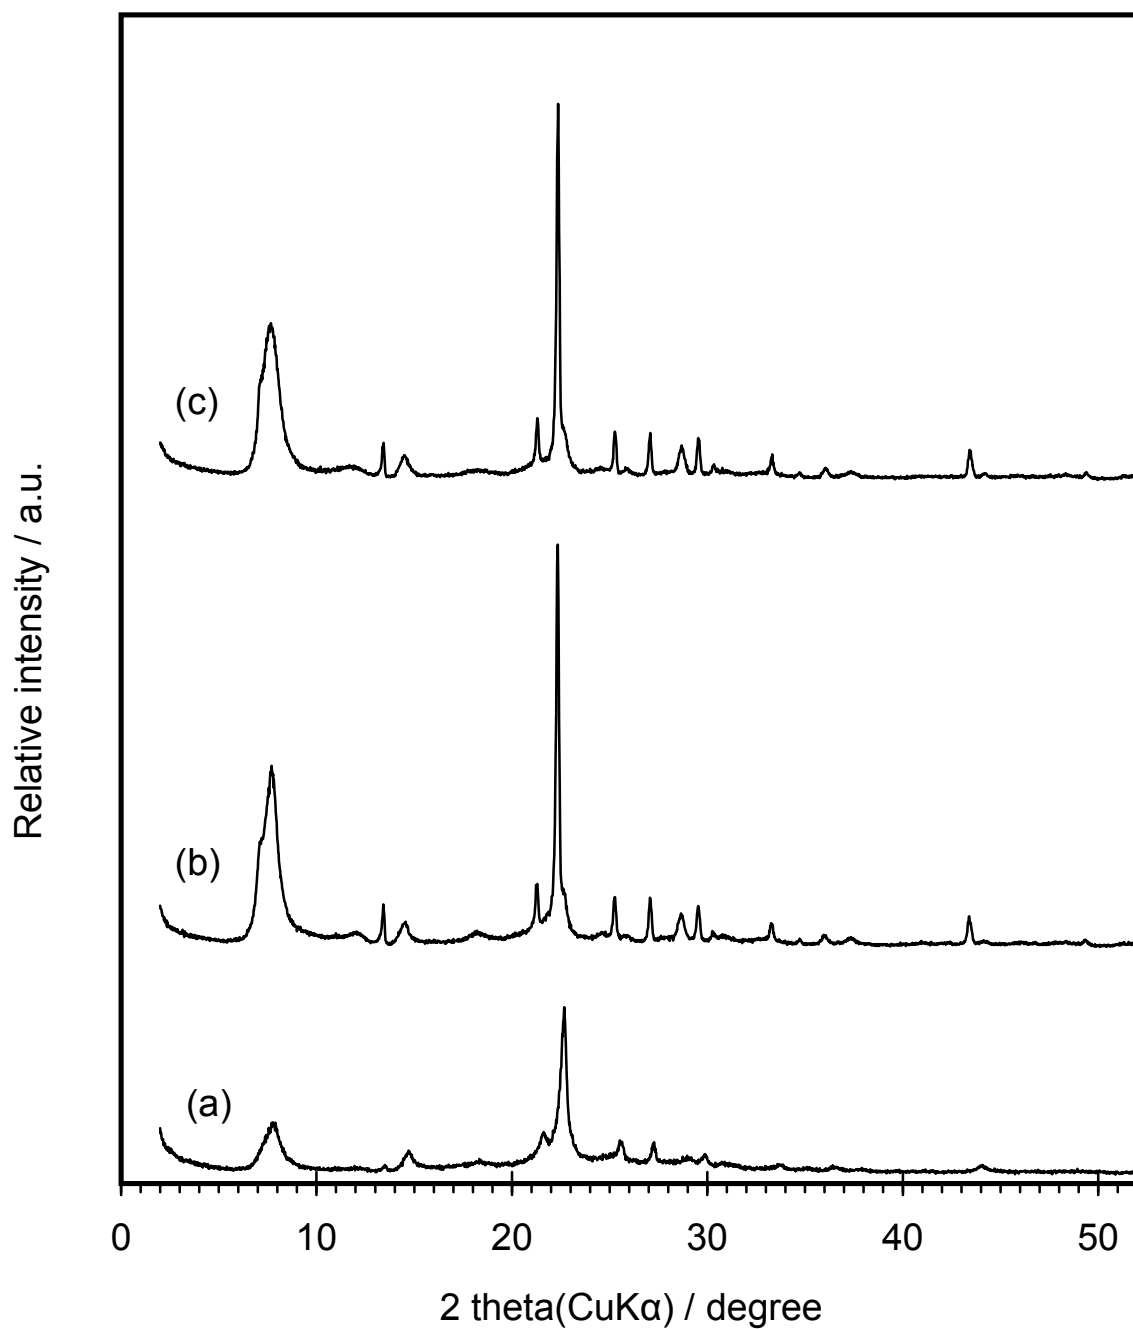

Figure S6. Powder XRD patterns of (a) dealuminated beta, (b) pure silica beta and (c) [Fe]-beta (Si/Fe = 58).

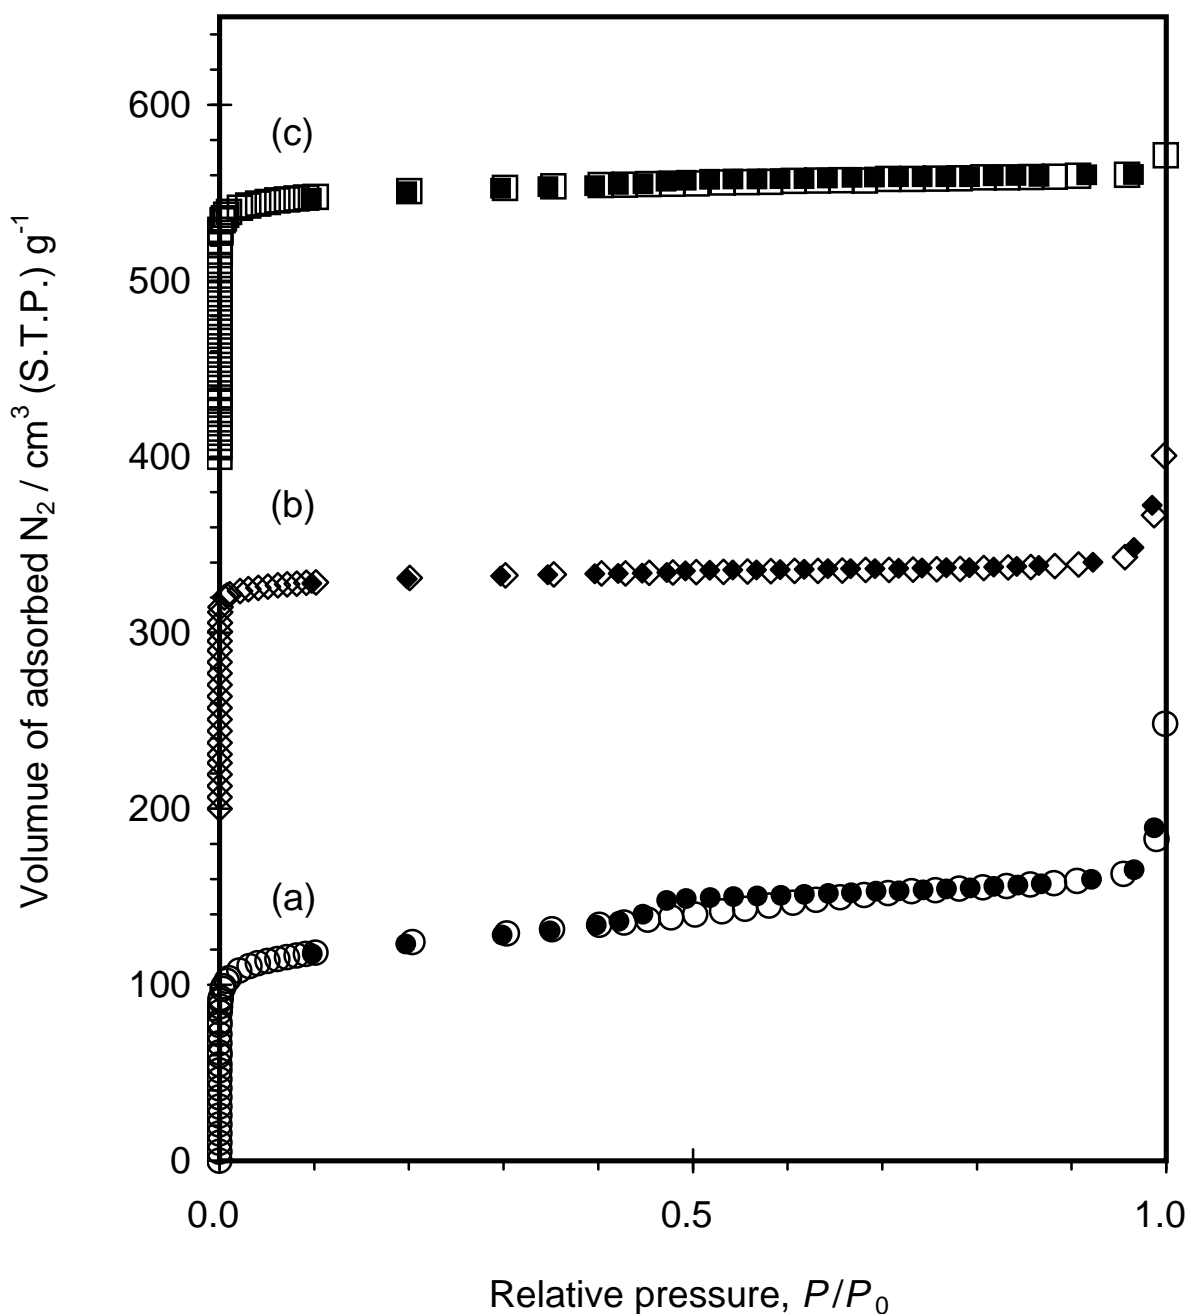

Figure S7. Nitrogen adsorption-desorption isotherms at 77 K of (a) dealuminated beta, (b) pure silica beta and (c) [Fe]-beta (Si/Fe = 58). The isotherms of (b) and (c) were offset vertically with 200 and 400  $\text{cm}^3$  (S.T.P.)  $\text{g}^{-1}$ , respectively. Open and closed symbols mean adsorption and desorption branches, respectively.

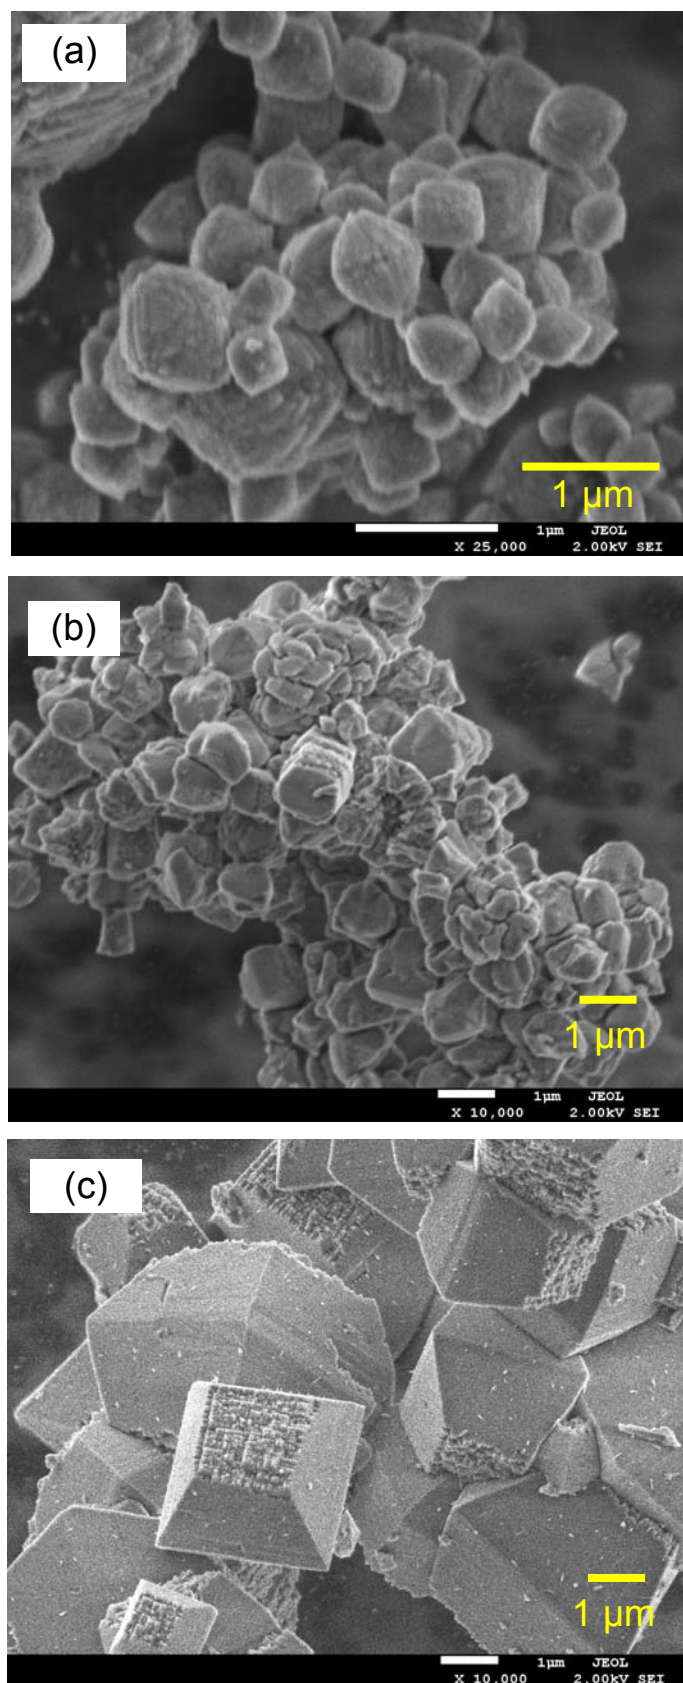

Figure S8. Typical SEM images of (a) dealuminated beta, (b) pure silica beta and (c) [Fe]-beta (Si/Fe = 58).

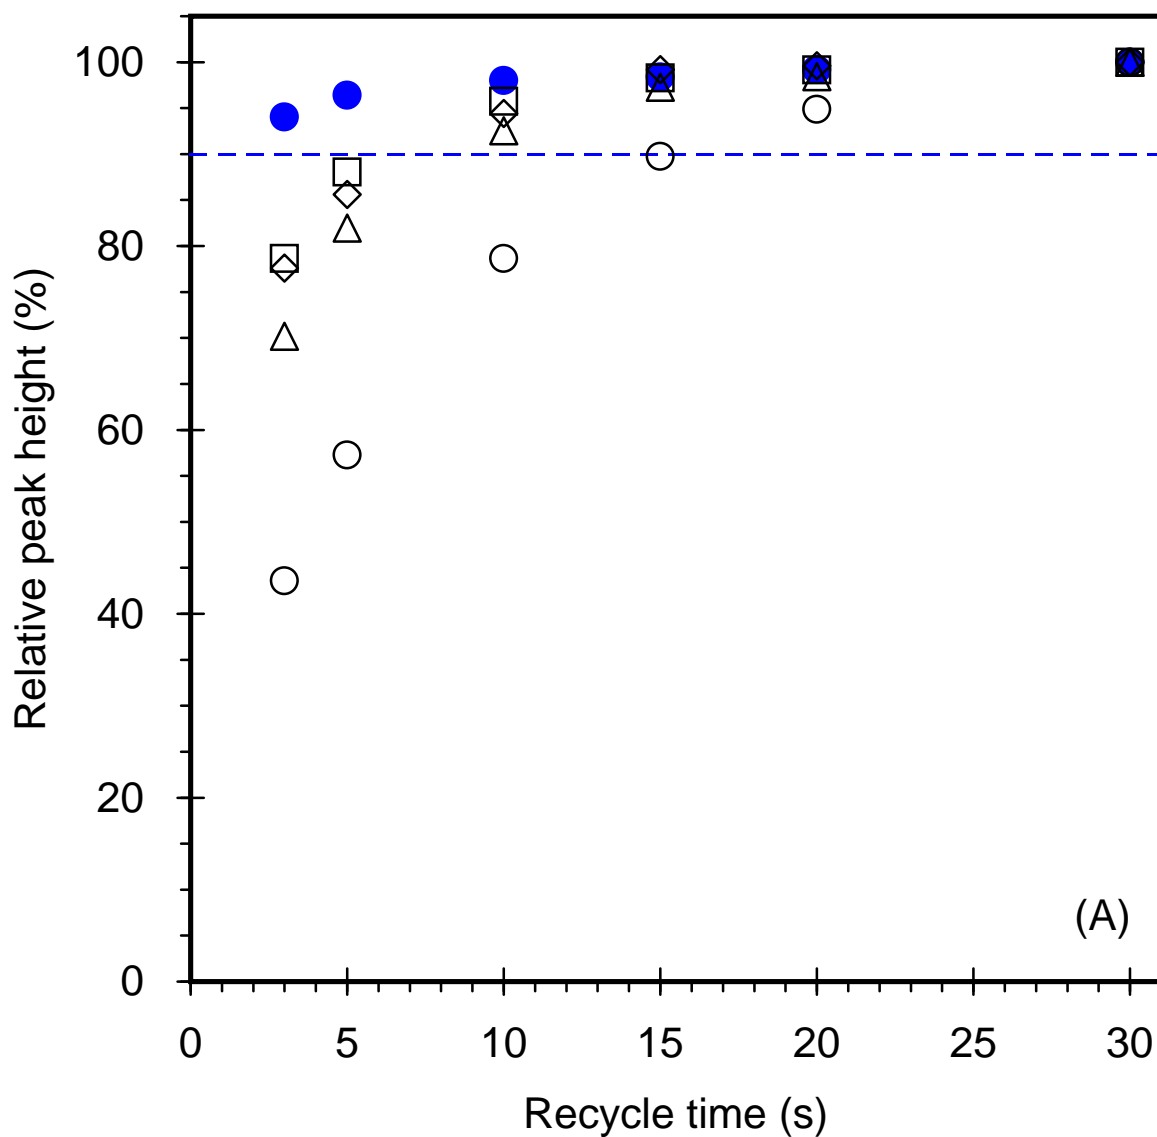

Figures S9. (A) Relative peak heights of  $Q^4$  signals at -112 ppm by various recycle times from 3 to 30 s. ( $\circ$ ) Unmodified deAl-beta; ( $\Delta$ ) 0.1-Cu(NO<sub>3</sub>)<sub>2</sub>/deAl-beta; ( $\diamond$ ) 0.3-Cu(NO<sub>3</sub>)<sub>2</sub>/deAl-beta; ( $\square$ ) 0.5-Cu(NO<sub>3</sub>)<sub>2</sub>/deAl-beta; ( $\bullet$ ) 1.0-Cu(NO<sub>3</sub>)<sub>2</sub>/deAl-beta.

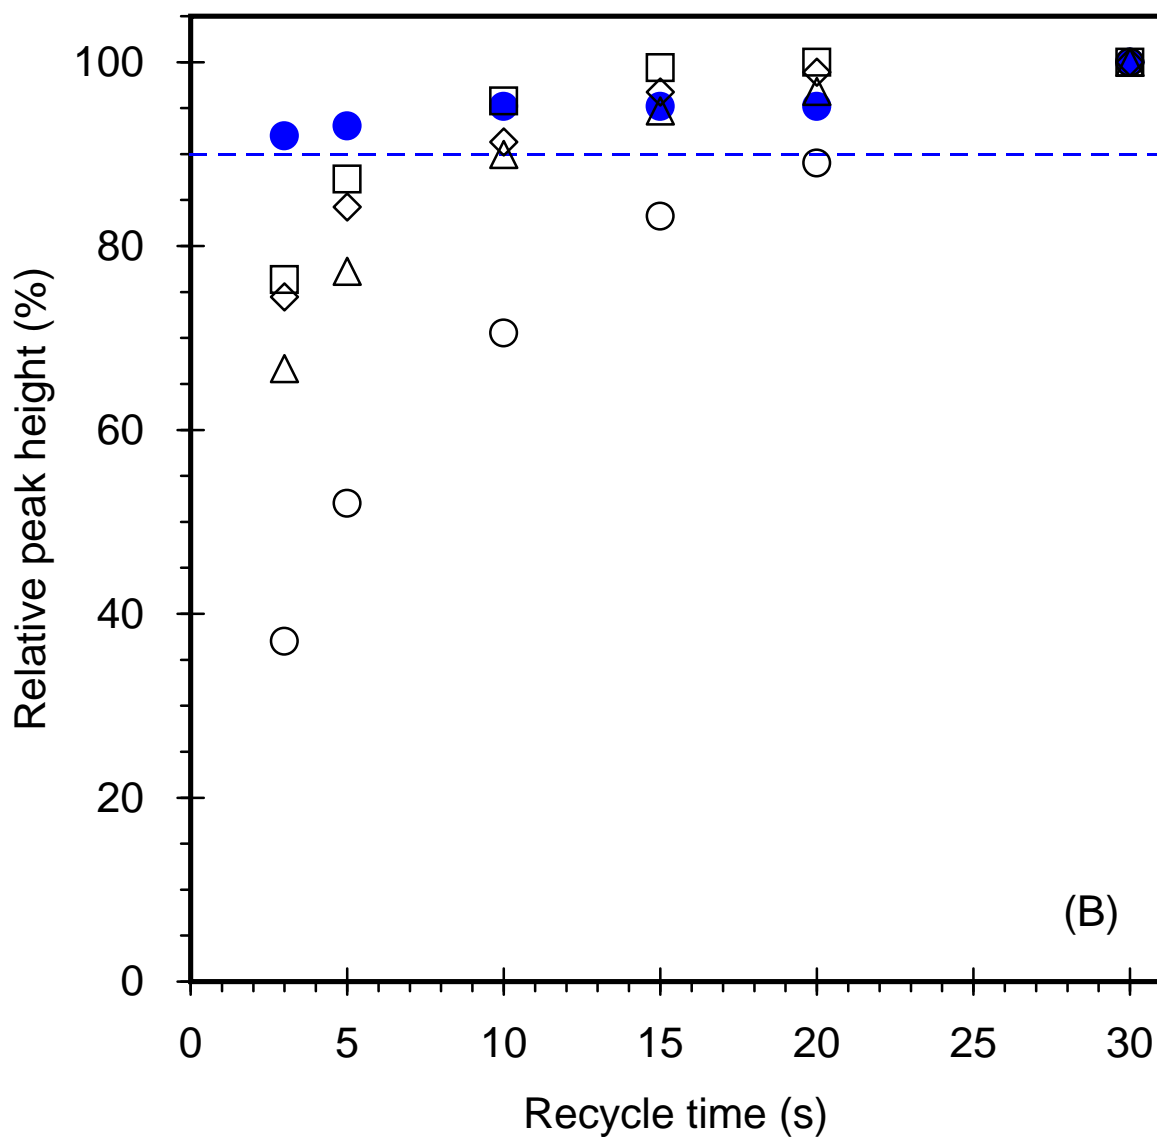

Figures S9. (B) Relative peak heights of Q<sup>4</sup> signals at -115 ppm by various recycle times from 3 to 30 s. (○) Unmodified deAl-beta; (△) 0.1-Cu(NO<sub>3</sub>)<sub>2</sub>/deAl-beta; (◇) 0.3-Cu(NO<sub>3</sub>)<sub>2</sub>/deAl-beta; (□) 0.5-Cu(NO<sub>3</sub>)<sub>2</sub>/deAl-beta; (●) 1.0-Cu(NO<sub>3</sub>)<sub>2</sub>/deAl-beta.

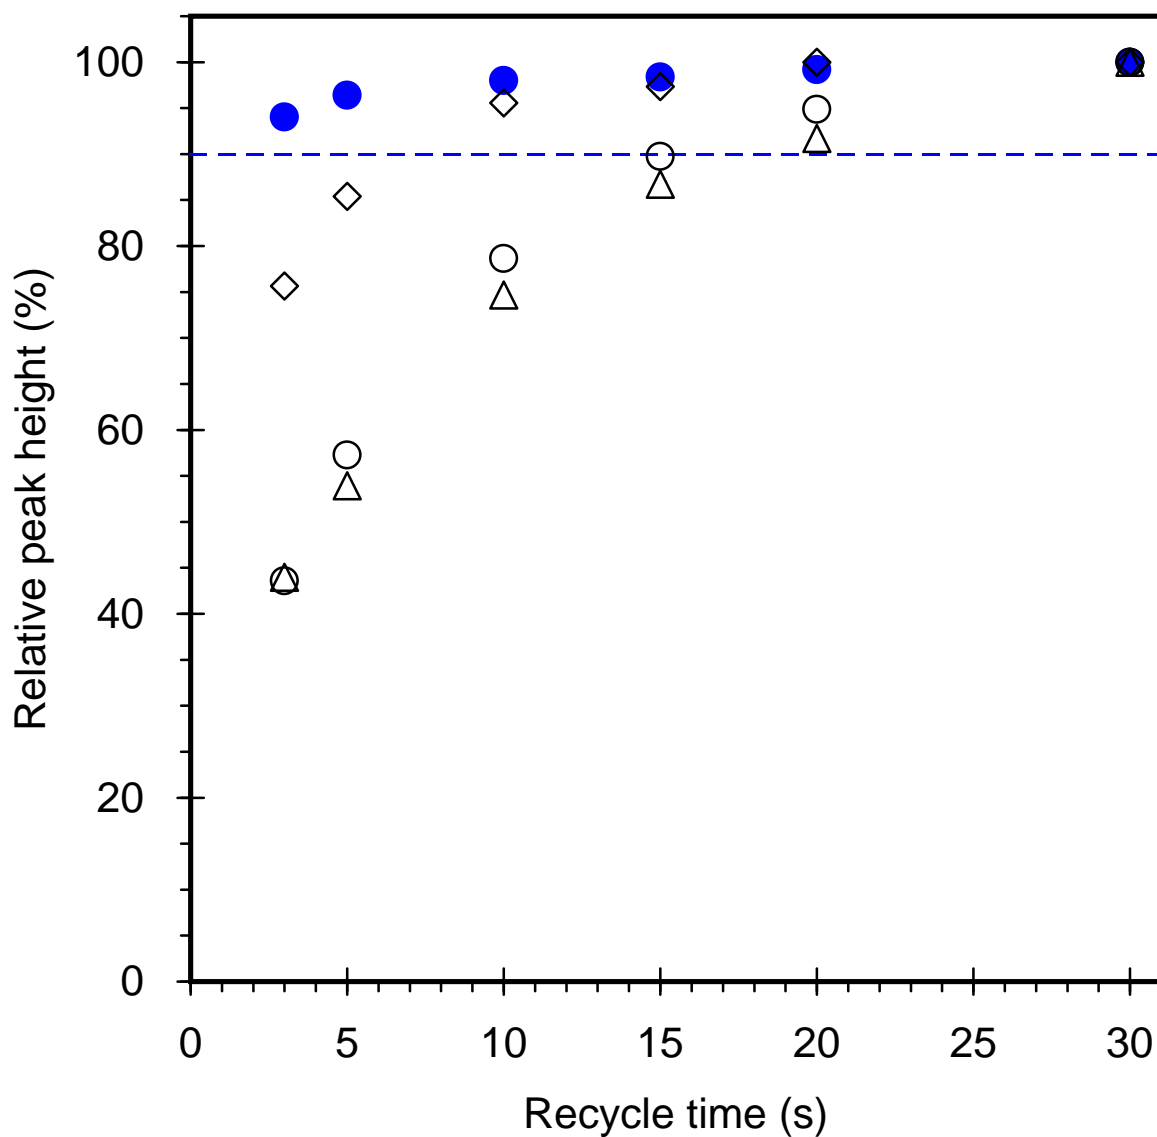

Figure S10. Relative peak heights of Q<sup>4</sup> signals at -112 ppm by various recycle times from 3 to 30 s. (○) Unmodified deAl-beta; (△) 1.0-Co(NO<sub>3</sub>)<sub>2</sub>/deAl-beta; (◇) 1.0-Ni(NO<sub>3</sub>)<sub>2</sub>/deAl-beta; (●) 1.0-Cu(NO<sub>3</sub>)<sub>2</sub>/deAl-beta.
